# Supplementary material for: Alternating strings and clusters in suspensions of charged colloids
Source: Royal Society of Chemistry journal article supplement (doi:10.1039/c6sm01283c), 2016-01-01
Supplement: c6sm01283c1.pdf [file c6sm01283c1.pdf]

# SUPPLEMENTARY INFORMATION

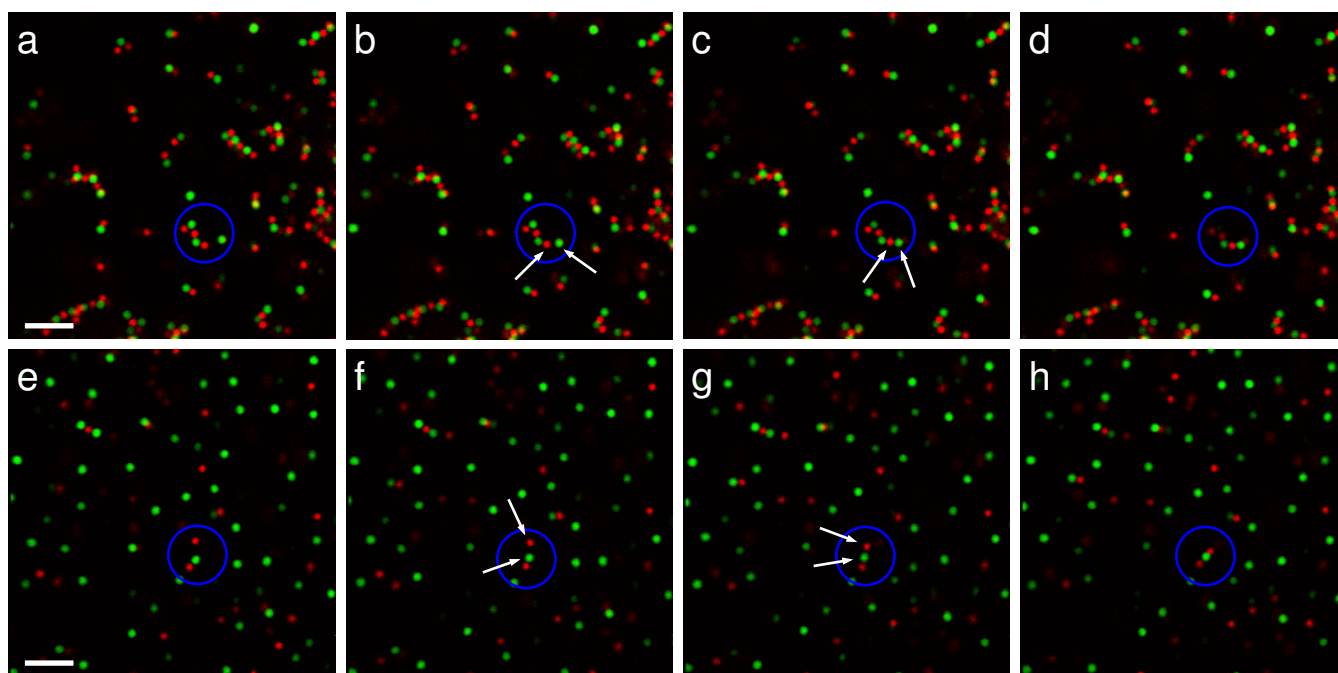

Figure S1. An uncropped version of Fig. 2, with scale bars that indicate  $10\ \mu\text{m}$ . As in Fig. 2, we show two sequences of four confocal images (a)–(d) and (e)–(h) showing the attachment of a large (green) and small (red) particle. The arrows indicate the particles that are involved in the attachment. The images were taken 1.3 mm and 1.1 mm from the CHB-water interface,  $\sim 1$  hours and  $\sim 4$  hours after mixing, respectively. In each case we show, from left to right, two images that were taken before attachment, followed by two images taken after attachment. The time step between two consecutive images was 1.04 s.

We also added the following movies that support the main text. Supplementary movie 1 corresponds to Fig. 1(a) and is shown in real time 5x speeded up. Movie 2 corresponds to Fig. 1(b), also as function of real time, but 7x speeded up. Supplementary movie 3 shows the suspension close to an oil-water interface for various values of the height  $z$  (the stacks are made over a total height of  $50\ \mu\text{m}$ ), and corresponds to to Fig. 1(c). Supplementary movie 4 shows the particle attachment (7x speeded up) of Fig. 2(a)–(d) (uncropped Fig. S1(a)–(d)), and a similar attachment process is shown in movie 5 for Fig. 2(e)–(h) (uncropped Fig. S1(e)–(h)). The attachment in both movies occurs after roughly 5 seconds.
